# Supplementary material
Source: ML conference proceedings conference paper supplement (https://openaccess.thecvf.com/content/CVPR2024/html/Zhao_MS-DETR_Efficient_DETR_CVPR_2024_paper.html)
Supplement: Supplementary file 1 [file Zhao_MS-DETR_Efficient_DETR_CVPR_2024_supplemental.pdf]

# MS-DETR: Efficient DETR Training with Mixed Supervision

Chuyang Zhao<sup>1,2</sup>, Yifan Sun<sup>1</sup>, Wenhao Wang<sup>3</sup>, Qiang Chen<sup>1</sup>, Errui Ding<sup>1</sup>, Yi Yang<sup>4</sup>, Jingdong Wang<sup>1\*</sup>  
<sup>1</sup> Baidu VIS   <sup>2</sup> Beihang University   <sup>3</sup> University of Technology Sydney   <sup>4</sup> Zhejiang University  
{zhaochuyang, sunyifan01, chenqiang13}@baidu.com  
wangwenhao0716@gmail.com, yangyics@zju.edu.cn  
{dingerrui, wangjingdong}@baidu.com

## A. Experiments about the quality of candidates

We present a comparative analysis of candidate quality between our MS-DETR and the baseline model. We use Deformable DETR++ [1, 4] with 900 queries as our baseline and build our MS-DETR by applying mixed supervision to it. We compare the quality of candidates in terms of two metrics: the mean Intersection over Union (IoU) score and the count of candidates.

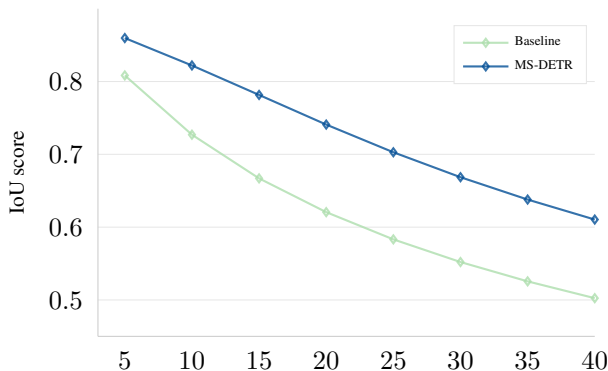

Figure 1. **Comparison of IoU scores of top- $k$  candidates.** The  $x$ -axis corresponds to the value of  $k$ , and the  $y$ -axis corresponds to the averaged IoU scores of the top- $k$  candidates of the COCO-2017 val set. One can see that the IoU scores of candidates in our MS-DETR surpass the baseline, which indicates the quality of the candidates is better with our approach.

We visualize the mean IoU score of top- $k$  candidates in Figure 1. For each ground-truth object, we select queries with top- $k$  IoU scores as its candidates. The mean IoU score is averaged over all ground-truth objects in the COCO-2017 [2] val set. We can see that with our mixed supervision, the mean IoU of top candidates surpasses the baseline by a large margin, indicating our MS-DETR generates better candidates.

In Figure 2, we visualize the count of high-quality candi-

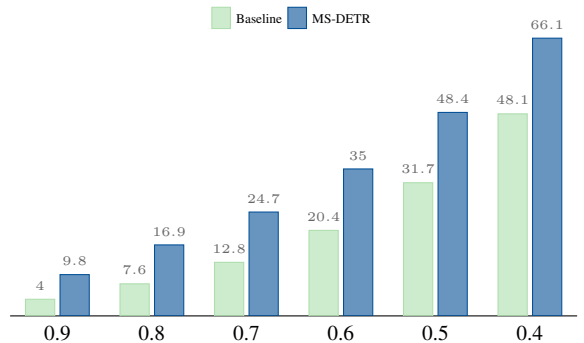

Figure 2. **Comparison of candidate numbers.** The  $x$ -axis corresponds to the value of IoU, and the  $y$ -axis corresponds to the number of candidates with IoU exceeding the specified threshold. The number of candidates is averaged across all ground-truth objects in the COCO-2017 val set. One can see that the number of high-quality candidates in our MS-DETR surpasses the baseline by a large margin.

dates generated by the baseline and our MS-DETR, across varying IoU thresholds. High-quality candidates are queries with an IoU exceeding a specific threshold. One can see that with mixed supervision, our MS-DETR generates more high-quality candidates than the baseline.

## B. Implementation details

We provide the implementation details of architecture (c) in Figure 2, which performs best among all MS-DETR variants.

The DETR decoder consists of multiple decoder layers. For clarity, we take one decoder layer for illustration. The input queries  $\mathbf{Q}$  for each decoder layer first go through cross-attention layer to collect information from image features  $\mathbf{I}$ , resulting in the features after cross-attention:

$$\mathbf{Q}_{ca} = \text{CrossAttn}(\mathbf{Q}, \mathbf{I}), \quad (1)$$

The features after cross-attention layer are then fed into the self-attention layer, followed by a feed-forward network

\*Corresponding author.

(FFN) to extract the features for one-to-one prediction:

$$\mathbf{Q}_{sa} = \text{SelfAttn}(\mathbf{Q}_{ca}), \quad \mathbf{Q}_{11} = \text{FFN}(\mathbf{Q}_{sa}), \quad (2)$$

The features after cross-attention layer are fed into an additional feed-forward network, yielding the features for one-to-many predictions:

$$\mathbf{Q}_{1m} = \text{FFN}(\mathbf{Q}_{ca}), \quad (3)$$

Both one-to-one and one-to-many predictions are derived using shared box and class predictors:

$$\begin{aligned} \mathbf{B}_{1m} &= \text{box}(\mathbf{Q}_{1m}), & \mathbf{S}_{1m} &= \text{cls}(\mathbf{Q}_{1m}) \\ \mathbf{B}_{11} &= \text{box}(\mathbf{Q}_{11}), & \mathbf{S}_{11} &= \text{cls}(\mathbf{Q}_{11}), \end{aligned} \quad (4)$$

### C. Details of one-to-many matching

We provide more details of our one-to-many matching introduced in Section 3.2. The algorithm establishes correspondences between the prediction sets  $\{\mathbf{y}_i\}_{i=1}^N$  and the ground-truth object sets  $\{\bar{\mathbf{y}}_j\}_{j=1}^M$ , where  $N$  is the number of predictions,  $M$  is the number of ground-truth objects. Each element  $\mathbf{y}$  in the prediction set consists of classification scores  $\mathbf{s}$  and box prediction  $\mathbf{b}$ . Similarly, each element  $\bar{\mathbf{y}}$  in the ground-truth object set consists of a ground-truth category  $\bar{c}$  and bounding box  $\bar{\mathbf{b}}$ .

Following [3], we assign multiple predictions to one ground-truth object according to three criteria. We first compute the matching score between one prediction and ground-truth pair:

$$\text{MatchScore}(\mathbf{s}, \mathbf{b}, \bar{c}, \bar{\mathbf{b}}) = \alpha \cdot s_{\bar{c}} + (1 - \alpha) \cdot \text{IoU}(\mathbf{b}, \bar{\mathbf{b}}).$$

We assign each prediction to the ground-truth object with the highest matching score to it. Then, we filter out low-quality queries with matching scores lower than the given threshold  $\tau$ . Finally, for each ground-truth object, we select top- $k$  predictions with highest matching scores as the matched results for this ground-truth object.

Optionally, we can merge the one-to-one matching set with our previously computed matching set as the final one-to-many matching set. This is because one-to-one matching results are derived using Hungarian matching, which may not align with our computed one-to-many matching results. For each matching item  $(\mathbf{y}_{\sigma(i)}, \mathbf{y}_i)$  in the one-to-one matching set, if it does not exist in the one-to-many matching set, we add it to the one-to-many matching set. We empirically find this operation brings slightly (0.1  $\sim$  0.2 mAP) improvement. The detailed procedure is illustrated in Algorithm 1.

### References

[1] Ding Jia, Yuhui Yuan, Haodi He, Xiaopei Wu, Haojun Yu, Weihong Lin, Lei Sun, Chao Zhang, and Han Hu. Detsr with hybrid matching. *arXiv preprint arXiv:2207.13080*, 2022. 1

---

### Algorithm 1 One-to-Many Matching Algorithm

---

```

1: Input: prediction set  $\{\mathbf{y}_i\}_{i=1}^N$ , ground-truth set  $\{\bar{\mathbf{y}}_j\}_{j=1}^M$ , threshold  $\tau$ , top-k value  $k$ , score weight  $\alpha$ , one-to-one matching set  $L_{11} = \{(\mathbf{y}_{\sigma(i)}, \bar{\mathbf{y}}_i)\}_{i=1}^N$ 
2: Output: one-to-many matching set  $L_{1m}$ 
3:
4: function MATCHSCORE( $\mathbf{s}, \mathbf{b}, \bar{c}, \bar{\mathbf{b}}$ )
5:   return  $\alpha \cdot s_{\bar{c}} + (1 - \alpha) \cdot \text{IoU}(\mathbf{b}, \bar{\mathbf{b}})$ 
6: end function
7:
8: Initialize  $L_{1m}$  as an empty set
9: for each ground-truth object  $\bar{\mathbf{y}}_j = (\bar{c}_j, \bar{\mathbf{b}}_j)$  do
10:   Initialize an empty list  $L_j$  for top-k matches
11:   for each prediction  $\mathbf{y}_i = (\mathbf{s}_i, \mathbf{b}_i)$  do
12:      $score \leftarrow \text{MATCHSCORE}(\mathbf{s}_i, \mathbf{b}_i, \bar{c}_j, \bar{\mathbf{b}}_j)$ 
13:     if  $score > \tau$  then
14:       Add  $(\mathbf{s}_i, \mathbf{b}_i, score)$  to  $L_j$ 
15:     end if
16:   end for
17:   Sort  $L_j$  by  $score$  in descending order
18:   Keep the top- $k$  elements of  $L_j$ 
19:   Add elements from  $L_j$  to  $L_{1m}$ 
20: end for
21:
22: for each pair  $(\mathbf{y}_{\sigma(i)}, \mathbf{y}_i)$  in  $L_{11}$  do
23:   if  $\mathbf{y}_i \neq \emptyset$  and  $(\mathbf{y}_{\sigma(i)}, \mathbf{y}_i) \notin L_{1m}$  then
24:     Append  $(\mathbf{y}_{\sigma(i)}, \mathbf{y}_i)$  to  $L_{1m}$ 
25:   end if
26: end for
27:
28: return  $L_{1m}$ 

```

---

[2] Tsung-Yi Lin, Michael Maire, Serge Belongie, Lubomir Bourdev, Ross Girshick, James Hays, Pietro Perona, Deva Ramanan, C. Lawrence Zitnick, and Piotr Dollár. Microsoft coco: Common objects in context, 2015. 1

[3] Jeffrey Ouyang-Zhang, Jang Hyun Cho, Xingyi Zhou, and Philipp Krähenbühl. Nms strikes back. *arXiv preprint arXiv:2212.06137*, 2022. 2

[4] Xizhou Zhu, Weijie Su, Lewei Lu, Bin Li, Xiaogang Wang, and Jifeng Dai. Deformable detr: Deformable transformers for end-to-end object detection. *arXiv preprint arXiv:2010.04159*, 2020. 1
